Anesthesiology  
1999; 91:1481-90  
© 1999 American Society of Anesthesiologists, Inc.  
Lippincott Williams & Wilkins, Inc.

## Meperidine and Lidocaine Block of Recombinant Voltage-Dependent Na<sup>+</sup> Channels

### Evidence that Meperidine is a Local Anesthetic

Larry E. Wagner II, B.S.,\* Michael Eaton, M.D.,† Salas S. Sabnis, B.S.,‡ Kevin J. Gingrich, M.D.§

**Background:** The opioid meperidine induces spinal anesthesia and blocks nerve action potentials, suggesting it is a local anesthetic. However, whether it produces effective clinical local anesthesia in peripheral nerves remains unclear. Classification as a local anesthetic requires clinical local anesthesia but also blockade of voltage-dependent Na<sup>+</sup> channels with characteristic features (tonic and phasic blockade and a negative shift in the voltage-dependence of steady-state inactivation) involving an intrapore receptor. The authors tested for these molecular pharmacologic features to explore whether meperidine is a local anesthetic.

**Methods:** The authors studied rat skeletal muscle  $\mu 1$  (RSKM1) voltage-dependent Na<sup>+</sup> channels or a mutant form heterologously coexpressed with rat brain Na<sup>+</sup> channel accessory  $\beta_1$  subunit in *Xenopus* oocytes. Polymerase chain reaction was used for mutagenesis, and mutations were confirmed by sequencing. Na<sup>+</sup> currents were measured using a two-microelectrode voltage clamp. Meperidine and the commonly used local anesthetic lidocaine were applied to oocytes in saline solution at room temperature.

**Results:** Meperidine and lidocaine produced tonic current inhibition with comparable concentration dependence. Meperidine caused phasic current inhibition in which the concentration-response relationship was shifted to fivefold greater concentration relative to lidocaine. Meperidine and lidocaine

negatively shifted the voltage dependence of steady-state inactivation. Mutation of a putative local anesthetic receptor reduced phasic inhibition by meperidine and lidocaine and tonic inhibition by lidocaine, but not meperidine tonic inhibition.

**Conclusions:** Meperidine blocks Na<sup>+</sup> channels with molecular pharmacologic features of a local anesthetic. The findings support classification of meperidine as a local anesthetic but with less overall potency than lidocaine. (Key words: Heterologous expression; mutagenesis, receptor.)

MEPERIDINE (ethyl 1-methyl-4-phenylisopropylcarbamate hydrochloride), a phenylpiperidine, is an opioid widely used for analgesia and sedation. In addition, meperidine produces sensory spinal anesthesia that is roughly equipotent with hyperbaric lidocaine,<sup>1-5</sup> suggesting that it is a local anesthetic (LA). Additional support for this proposal is derived from reports of action-potential block in peripheral nerve<sup>6-9</sup> and muscle.<sup>10</sup> However, the ability of meperidine to produce clinical local anesthesia in peripheral nerve remains unclear because meperidine caused local anesthesia in intravenous regional anesthesia<sup>11,12</sup> but failed to produce median nerve blockade using local infiltration.<sup>13</sup> Classification as an LA requires clinical local anesthesia but also characteristic blockade of voltage-dependent Na<sup>+</sup> channels involving an intrapore receptor.<sup>14</sup>

Voltage-dependent Na<sup>+</sup> channels are membrane-spanning proteins that form voltage-sensitive, Na<sup>+</sup> selective pores through the membranes of excitable cells and are essential to action-potential initiation and propagation. The pore is regulated by channel gates. At resting membrane potentials, Na<sup>+</sup> channels are in a resting state in which the pore is closed by activation gates. Membrane depolarization induces conformational changes that open activation gates, resulting in conduction of Na<sup>+</sup> ions through the pore and Na<sup>+</sup> current. Continued depolarization triggers closure of an inactivation gate, occlusion of the channel pore, and current termination. Membrane repolarization returns the channel to the rest-

\* Technical Associate, Department of Anesthesiology.

† Assistant Professor, Department of Anesthesiology.

‡ Intern, Department of Anesthesiology.

§ Associate Professor, Departments of Anesthesiology and Pharmacology and Physiology.

Received from the Departments of Anesthesiology and Pharmacology and Physiology, University of Rochester School of Medicine, Rochester, New York. Submitted for publication February 19, 1999. Accepted for publication June 8, 1999. Supported by grant no. GM56958 from the National Institutes of Health, Bethesda, Maryland; and University of Rochester Anesthesiology Group Research Fund, University of Rochester School of Medicine, Rochester, New York. Presented at the annual meeting of the American Society of Anesthesiologists, Orlando, Florida, October 13, 1998.

Address reprint requests to Dr. Gingrich: Department of Anesthesiology, Box 604, University of Rochester School of Medicine, 601 Elmwood Avenue, Rochester, New York 14642. Address electronic mail to: kgingrich@anes.rochester.edu

ing state by shutting activation gates and opening the inactivation gate.<sup>15</sup>

Local anesthetics are commonly tertiary amines linked through an amide or ester linkage to an aromatic moiety. They exert clinical effects through the blockade of voltage-dependent Na<sup>+</sup> channels. Key features of LA action are tonic and phasic current inhibition and a negative shift in the voltage dependence of steady-state inactivation. Tonic or "resting" inhibition arises from channel blockade in the absence of recent activity. Phasic or "use-dependent" inhibition is progressive current depression during repetitive stimulation that stems from the accumulation of long-lasting, drug-blocked states. These complex features of LA action are concisely explained by a modulated receptor,<sup>16,17</sup> which extended earlier mechanistic proposals of LA action.<sup>18,19</sup> The hypothesis holds that LAs bind to an intrapore receptor with variable affinity that is determined by channel state; those associated with opening (open and inactivated) have high affinity. Furthermore, bound channels are non-conducting and give rise to stabilized, drug-blocked states as reported by a negative shift in the voltage dependence of steady-state inactivation.<sup>15,20</sup> A recent investigation has begun to identify the structural underpinnings of an intrapore LA receptor.<sup>21</sup>

We investigated the effects of meperidine and the commonly used LA lidocaine on currents of rat skeletal muscle  $\mu_1$   $\alpha$ -subunit (RSkM1) Na<sup>+</sup> channels expressed heterologously with rat brain  $\beta_1$  accessory subunit in *Xenopus* oocytes. The approach allowed study of a homogeneous Na<sup>+</sup> channel population and examination of the role of an intrapore LA receptor by manipulating channel structure through mutagenesis and expression. A preliminary version of this work has been published in abstract form.<sup>22</sup>

## Material and Methods

### Molecular Biology

Rat skeletal muscle Na<sup>+</sup> channel  $\mu_1$   $\alpha$ -subunit (RSkM1; provided by Dr. David Yue, Department of Biomedical Engineering, The Johns Hopkins University) was inserted in pBluescript (KS-) at EcoRI. RSkM1 was mutated from wild type ( $\alpha_{WT}$ :[F1579]) to the F1579A genotype ( $\alpha_{F1579A}$ :[A1579]) using sequential polymerase chain reaction-based mutagenesis.<sup>23</sup> Oligonucleotides were synthesized on Applied Biosystems DNA synthesizers (Foster City, CA). Mutations were confirmed using dideoxynucleotide sequencing. Rat brain Na<sup>+</sup> channel

accessory  $\beta_1$  subunit was provided by Dr. William Caterall, Department of Pharmacology, University of Washington, in pBluescript (KS+) inserted at EcoRI. *Xenopus*  $\beta$ -globin untranslated region flanked  $\alpha_{WT}$ ,  $\alpha_{F1579A}$ , and  $\beta_1$  in pBluescript (KS-) to enhance expression. cRNA was synthesized using T3 RNA polymerase after a linearizing cut at Sal I followed by 5' capping.

### Oocyte Expression

*Xenopus* oocytes were obtained from frogs purchased from Nasco (Fort Atkinson, WI). Oocytes were defolliculated in preparation for RNA injection and electrical recording by exposure to collagenase (0.2 mg/ml, type II; Sigma, St. Louis, MO) for 1–3 h at 20°C. Oocytes were injected with 30–50 nl (5–20 ng) of 5' capped cRNA of  $\alpha_{WT}$  or  $\alpha_{F1579A}$  with  $\beta_1$  (1:1 ratio by weight), referred to as WT- $\beta_1$  and F1579A- $\beta_1$ , respectively. Na<sup>+</sup> channel expression in oocytes requires coexpression with  $\beta_1$  to duplicate *in vivo* channel function.<sup>24–26</sup> The oocytes were kept for 1–7 days at 16°C, during which time they were tested for expression using two-electrode voltage clamp.

### Two-electrode Oocyte Voltage Clamp

Bath solution contained 100 mM NaCl, 2 mM KCl<sub>2</sub>, 1.8 mM CaCl<sub>2</sub>, 1 mM MgCl<sub>2</sub>, and 5 mM HEPES, and pH was adjusted to 7.6 with NaOH at 22°C. Oocytes were voltage-clamped using a standard two-microelectrode voltage clamp technique. Electrodes were pulled from borosilicate glass pipettes and filled with 3 M KCl. Electrode resistances were 0.2–0.6 M $\Omega$ . Membrane potential was controlled with a voltage clamp amplifier (Model OC-725C, Warner Instruments, Hamden, CT). Only currents < 10  $\mu$ A were analyzed. A grounded metal shield was inserted between the two electrodes to minimize electrode coupling and speed clamp rise time. Typical charging curves, integral of capacity transient during voltage-clamp depolarization that did not trigger channel activation, were approximated by monoexponential functions with time constants < 0.3 ms.

Voltage commands were generated by a 12-bit digital/analog converter driven by software of our own design written in Axobasic (Axon Instruments, Foster City, CA). Currents were filtered at 1 kHz (–3 dB, 4-pole Bessel) and sampled at > 4 kHz by a 12-bit analog/digital converter. Na<sup>+</sup> currents were measured using two-electrode voltage clamp (holding potential of –100 mV) 2–7 days after injection. Capacity transients were compensated for using a P/6 protocol<sup>27</sup> in which P/6 pulses were

MEPERIDINE AND LIDOCAINE BLOCK OF RECOMBINANT Na<sup>+</sup> CHANNELS

applied at least 10 s before data collection to prevent artifact.

Cells were held at  $-100$  mV between infrequent test pulses ( $-10$  mV, 20 ms, > every 10 s). This protocol allowed inactivated channels to return to resting state before delivery of subsequent test pulses. Cells exposed to meperidine or lidocaine (0–20 mM) required approximately 5 min for Na<sup>+</sup> current magnitudes to stabilize. The currents of cells exposed to > 5 mM did not return to control values despite multiple washings with control solutions and intervals up to 30 min. Otherwise, cells were included if currents returned to within 5% of control before drug exposure. Other voltage protocols were delivered infrequently (> every 10 s) or as described in Results with data subjected to the same inclusion criterion.

#### Statistical and Data Analysis

Normalized current concentration–response relationships were fit with the following logistic equation:

$$I = 1/(1 + (C/IC_{50})^{\text{slope}_1})$$

where  $I$  is current magnitude normalized by control,  $C$  is the agent concentration,  $IC_{50}$  is the half blocking concentration, and  $\text{slope}_1$  is a slope factor related to the Hill coefficient. Normalized current amplitude responses over time were fit with the multiexponential function:

$$I = \sum A_i \cdot \exp(-t/\tau_i)$$

where  $I$  is the normalized current,  $t$  is time,  $A_i$  are the component amplitudes, and  $\tau_i$  is the time constant of the  $i$ th exponential component. Normalized current voltage response relationships were fit with the two-state Boltzmann equation:

$$I = 1/(1 + \exp[(v - v_{1/2})/\text{slope}_b])$$

where  $I$  is the current amplitude normalized by control,  $v$  is membrane voltage,  $v_{1/2}$  is the voltage at half value, and  $\text{slope}_b$  is a slope factor. Equation parameters were estimated using a nonlinear, least-squares algorithm. Goodness of fit was determined by visual inspection. Grouped data are given as mean  $\pm$  SEM. One-tailed  $P$  values < 0.05 were considered to have statistical significance.

## Results

Hallmark features of LA modulation of voltage-dependent Na<sup>+</sup> channels include tonic and phasic current

inhibition and a negative shift of the voltage dependence of steady-state inactivation. These effects are mediated by a putative intrapore LA receptor. We wished to examine meperidine effects in a heterologously expressed Na<sup>+</sup> channel so that primary protein structure could be manipulated through mutagenesis. The general features of LA action are shared by Na<sup>+</sup> currents of nervous, skeletal, and cardiac muscle tissue<sup>16,18,28–30</sup> as well as their expressed tissue-specific isoforms.<sup>21,26,31</sup> This indicates that fundamental structures mediating LA action are conserved, and observations made in these isoforms have general import. Consequently, we studied rat skeletal muscle Na<sup>+</sup> channel  $\mu_1$   $\alpha$ -subunit (RskM1) because our laboratory is familiar with its heterologous expression, current recording, and molecular manipulation.

We first addressed tonic inhibition, which reflects channel blockade arising from LA binding to resting and possibly open channels. Figure 1A shows a family of Na<sup>+</sup> currents ( $I_{\text{Na}}$ ) elicited from an individual oocyte expressing wild-type RskM1 (WT- $\beta_1$ ) Na<sup>+</sup> channels (see Methods). The control response manifests a typical native  $I_{\text{Na}}$  time course that is marked by rapid activation reaching a current peak within milliseconds, followed by current decay caused by fast inactivation. Current-voltage relationships peak at approximately  $-10$  mV (data not shown), which is also consistent with native currents and reports of WT- $\beta_1$  expressed in oocytes.<sup>26,32</sup> Lidocaine application caused a concentration-dependent reduction of  $I_{\text{Na}}$  amplitude, reflecting an increasing proportion of tonically blocked channels. Figure 1B shows an  $I_{\text{Na}}$  family elicited from another oocyte expressing WT channels over a range of meperidine concentrations. Interestingly, meperidine also reduced  $I_{\text{Na}}$  amplitude in a dose-dependent fashion, marking its ability to induce tonic channel block. A lidocaine concentration–response relationship for normalized current (fig. 1C) reports the fraction of available, unblocked channels *versus* lidocaine concentration. The relationship was well fit by a logistic equation (see Methods). The fitted  $IC_{50}$  for lidocaine (1.9 mM) is comparable to those reported by Nuss *et al.*<sup>26</sup> ( $IC_{50} = 1.1$  mM) and Balser *et al.*<sup>33</sup> ( $IC_{50} = 1.2$  mM) for WT- $\beta_1$  expressed in oocytes. Remarkably, the concentration–response relationships from grouped data nearly superimpose (fig. 1C), indicating close quantitative potency.

We next tested for phasic inhibition using a pulse train (15 Hz) protocol (fig. 2). Figure 2A plots normalized  $I_{\text{Na}}$  amplitudes *versus* pulse number. In control,  $I_{\text{Na}}$  amplitudes vary little, indicating high channel availability at each pulse and, therefore, little accumulation of inacti-

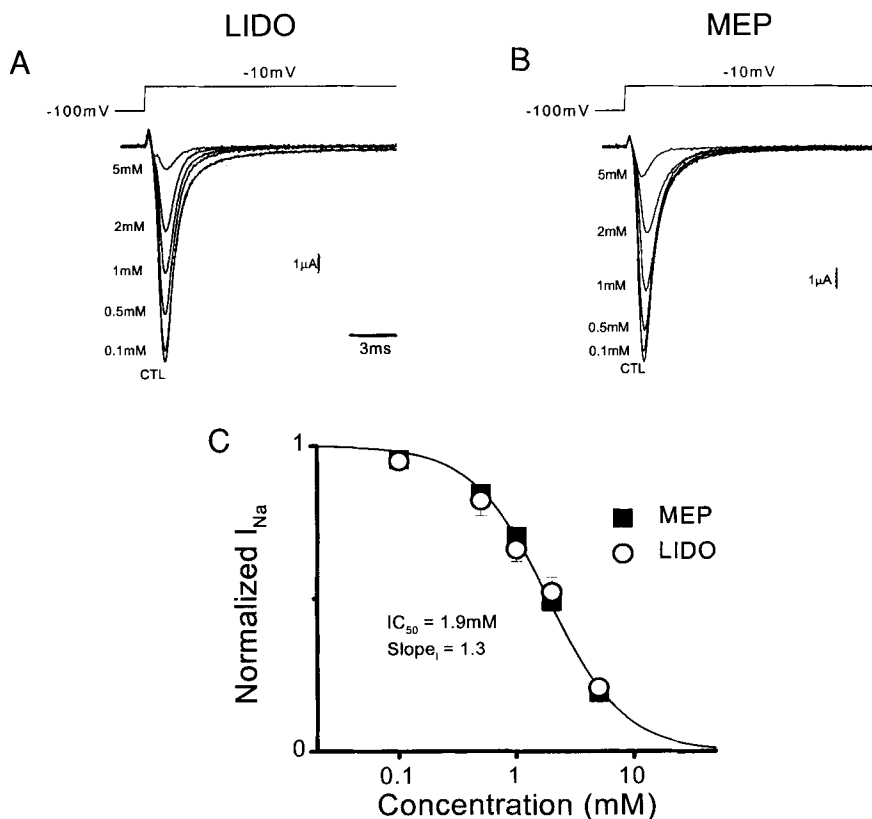

Fig. 1. Tonic block of WT- $\beta_1$  Na<sup>+</sup> channels. Na<sup>+</sup> currents ( $I_{Na}$ ) recorded from individual *Xenopus* oocytes expressing WT- $\beta_1$  channels triggered by the indicated voltage protocols over a range of lidocaine (LIDO; A) and meperidine (MEP; B) concentrations (control = CTL), as indicated to left of the respective trace. Channel opening is reflected by a downward current deflection. (C) Concentration-response relationships for  $I_{Na}$  amplitudes normalized by control for meperidine and lidocaine in grouped data ( $n = 5-9$ ). Solid line represents logistic equation fit of lidocaine response with indicated parameters (see Methods).

ated channels over the train. Constant lidocaine concentration caused progressive reductions in  $I_{Na}$  amplitudes, which reached an apparent plateau near pulse no. 5. The declining phase of this response can be explained by decreasing channel availability resulting from accumulation of slowly recovering, depolarization blocked

channels. In this analysis, the plateau reflects an equilibrium between intrapulse blockade and interpulse recovery and reports the steady-state fraction of available, unblocked channels. This value is approximately 0.3 for lidocaine. Notably, meperidine application caused qualitatively similar effects, thereby marking phasic inhibi-

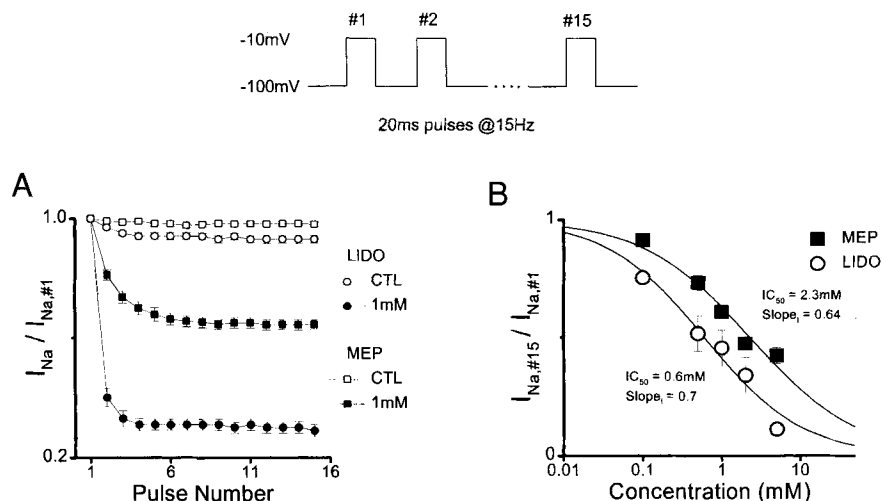

Fig. 2. Phasic block of WT- $\beta_1$  Na<sup>+</sup> channels. Phasic or “use-dependent” blockade arises from the accumulation of drug-blocked channels induced by a train of depolarizations. Phasic blockade was assayed using the indicated pulse train (15 Hz; top). (A) Plot of  $I_{Na}$  amplitudes for each pulse normalized to that of pulse no. 1 vs. pulse number for control (CTL), 1 mM lidocaine (LIDO), and meperidine (MEP) in grouped data ( $n = 5-8$ ). (B) Concentration-response relationships for the ratio of  $I_{Na}$  amplitudes of pulse nos. 15 to 1 ( $I_{Na,\#15}/I_{Na,\#1}$ ) in grouped data ( $n = 5-8$ ). Smooth curves represent logistic equation fits of the relationships with indicated parameters.

MEPERIDINE AND LIDOCAINE BLOCK OF RECOMBINANT Na<sup>+</sup> CHANNELS

**Fig. 3. Recovery from depolarization-induced blockade of WT- $\beta_1$  Na<sup>+</sup> channels.** (Top) The two-pulse protocol used to determine the time course of channel recovery from nonconducting states induced by the prepulse. (A) Plot of the amplitudes of I<sub>Na</sub>s triggered by the test pulse and normalized to that of prepulse in control and the presence of lidocaine (LIDO, indicated concentration) *vs.* recovery interval (n = 6). In control, the response was accounted for (see Methods) by a single fast exponential function, whereas in lidocaine, the response was well-fit by a biexponential function (solid lines, parameters indicated). (B) Same as in (A) but for meperidine (MEP, indicated concentration; n = 5); see text for details.

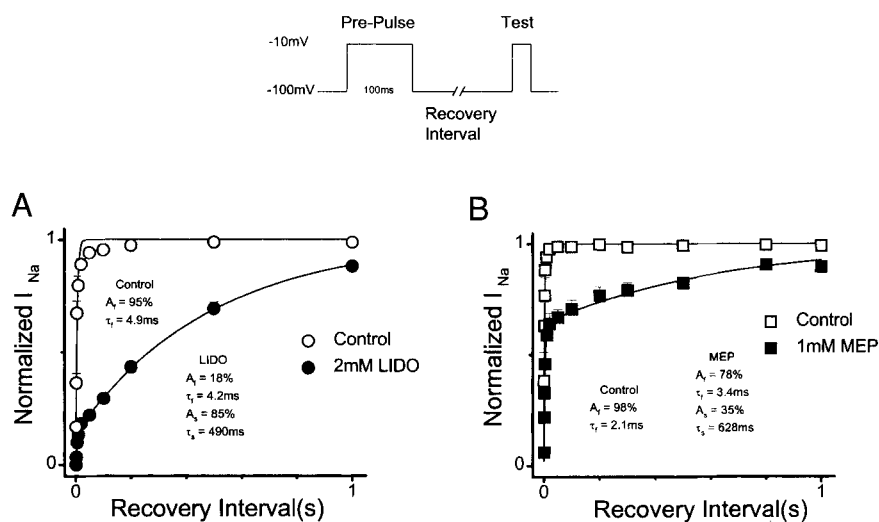

tion. The meperidine response manifests a plateau of approximately 0.6, indicating less steady-state phasic block. We considered the ratio of I<sub>Na</sub> amplitudes for pulse nos. 15 and 1 ( $I_{Na, \#15}/I_{Na, \#1}$ ) a convenient gauge of plateau value. We examined this indicator over a wide concentration range and constructed concentration-response relationships (fig. 2B). Both relationships were well fit by a logistic equation with comparable slopes. The meperidine relationship is shifted rightward, signifying lower potency. Assuming these agents differ only in the affinity of a target receptor, the differences in IC<sub>50</sub> values of logistic equations suggest a fourfold lower affinity for meperidine.

Phasic inhibition arises from depolarization-induced, drug-blocked states with slower recovery than control fast inactivation (approximately 20 ms). Therefore, increased lidocaine potency in phasic inhibition can arise from either greater lidocaine potency in depolarization-induced block or slower recovery of resultant blocked states. We used a two-pulse protocol (fig. 3) to explore the recovery time course of depolarization-induced, nonconducting states. Figure 3A plots normalized I<sub>Na</sub> amplitude *versus* recovery interval, which conveys the time course of channel availability after the prepulse. We described time courses using multiexponential functions (see Methods). In control, short recovery intervals (< 2 ms) resulted in a near-zero response, where most channels were fast inactivated during the prepulse and remained so over these brief recovery periods. Increasing recovery interval caused a rapid monoexponential increase ( $\tau_r = 4.9$  ms), reflecting swift channel recovery from fast inactivation. Lidocaine markedly altered this response by introducing a new slow exponential ( $\tau_s =$

490 ms), likely representing recovery of drug-blocked channels. The fast component was reduced by roughly fivefold compared with control, indicating fewer exclusively inactivated channels. Meperidine also induced a new slow component (fig. 3B) representing drug-blocked channels that recovered with a similar time constant ( $\tau_s = 628$  ms). The smaller magnitude of this component is explained by a twofold lower concentration relative to lidocaine and less sensitivity to depolarization-induced drug block. Therefore, greater lidocaine potency in phasic inhibition arises from higher channel sensitivity to depolarization-induced drug block.

With meperidine tonic and phasic inhibition established, we considered drug-induced alterations in the voltage-dependence of steady-state inactivation using a two-pulse voltage protocol (fig. 4). The 100-ms prepulse is sufficiently long to fix a new steady-state relation between resting and fast inactivated channels. We plotted normalized test I<sub>Na</sub> *versus* prepulse voltage (fig. 4A), which charts the voltage-dependence of available resting channels. In control, for largely negative prepulses (< -80 mV), this relationship is nearly one, indicating high channel availability. Increasing depolarization reduces the relationship, which approaches zero near -30 mV. This indicates a shift from available resting channels to the unavailable fast inactivated state. Lidocaine negatively displaced this relationship by approximately 9 mV as reported by Boltzmann function fits (see Methods) and without appreciable changes in slope. The reduction of availability and hence LA promotion of nonconducting states may arise from stabilization of inactivated<sup>15,19,34,35</sup> or deactivated states.<sup>36</sup> Because meperidine is nearly fivefold less potent in phasic blockade (fig.

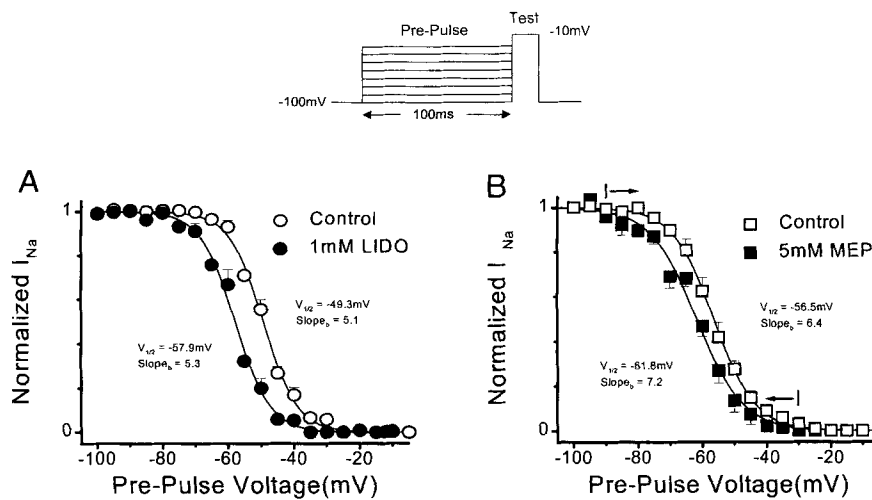

**Fig. 4.** Voltage dependence of steady-state inactivation in WT- $\beta_1$   $\text{Na}^+$  channels. Voltage dependence of steady-state inactivation was assayed using a two-pulse voltage protocol (*top*). (A) Plot of test  $I_{\text{Na}}$  amplitude normalized by control  $I_{\text{Na}}$  amplitude (test pulse with no prepulse) vs. prepulse voltage in control and lidocaine (LIDO; indicated concentration) in grouped data ( $n = 5-7$ ). (B) The same relationships ( $n = 5-8$ ) for control and meperidine (MEP; indicated concentration). Arrows denote a range of data populations in which control and meperidine groups are statistically different. Smooth curves are Boltzmann function fits with indicated parameters.

2B), we used a fivefold greater and approximately equipotent meperidine concentration. Notably, meperidine application caused a similar negative shift (approximately 5 mV) characteristic of LA action and consistent with stabilization of nonconducting states.

The main functional component of the  $\text{Na}^+$  channel is a 260-kDa pore-forming  $\alpha$  subunit. Its sequence is highly conserved among nervous, cardiac, and skeletal tissues, indicating a common fundamental structure in which the channel is arranged in the membrane as four homologous domains or repeats (I-IV). Each domain contains at least six  $\alpha$ -helical transmembrane repeats S1-S6 (fig. 5A). The four domains are thought to come together like staves of a barrel to form the integral ion channel pore.<sup>37</sup> Recently, critical amino acid residues affecting LA block in expressed rat brain IIA  $\text{Na}^+$  channels were identified and proposed to contribute to an intrapore LA receptor.<sup>21</sup> Among these, phenylalanine (F) 1764, when mutated to alanine, produced relative LA insensitivity. Figure 5A shows the extracellular S5-S6 loop, residues of  $\alpha$ -helix of domain IVS6, and the location of the homologous residue (F1579) in RSkM1. To test for the involvement of the putative intrapore LA receptor in meperidine action, we mutated F1579 to alanine and reexamined meperidine and lidocaine blockade.

Figure 5B shows  $I_{\text{Na}}$ s elicited from individual oocytes expressing F1579A- $\beta_1$  channels. Control responses show typical activation and inactivation time courses, which, in combination with unaltered current-voltage relationships (data not shown), indicate unchanged fundamental channel properties. Lidocaine depressed  $I_{\text{Na}}$  amplitude nearly threefold less than that for WT- $\beta_1$  channels, which reports a noticeable reduction in tonic block

sensitivity (fig. 1). Given the parallel effects of meperidine and lidocaine heretofore, we were surprised that  $I_{\text{Na}}$  sensitivity to meperidine seemed unchanged from WT- $\beta_1$  (fig. 1), suggesting no change in meperidine tonic block. These observations were confirmed in concentration-response relationships from grouped data (fig. 5B). The lidocaine relationship for F1579A- $\beta_1$  is rightward-shifted compared with that for WT- $\beta_1$ , resulting in a threefold reduction in sensitivity based on changes in  $\text{IC}_{50}$  values and consistent with previous reports.<sup>21</sup> However, the meperidine relationship is unchanged from WT- $\beta_1$ , suggesting that F1579 is uninvolved in meperidine tonic block (see Discussion).

We assayed phasic blockade of F1579A- $\beta_1$  using the earlier pulse train protocol (fig. 5C). We constructed concentration-response relationships for the ratio of  $I_{\text{Na}}$  amplitudes for pulse nos. 15 and 1 ( $I_{\text{Na},\#15}/I_{\text{Na},\#1}$ ), which reports the steady-state fraction of available channels (fig. 5C). The steepness of the lidocaine relationship was dramatically reduced, resulting in a more than fourfold increase at higher concentrations ( $> 2$  mM) relative to WT- $\beta_1$ . This indicates a marked reduction in phasic block sensitivity consistent with prior results.<sup>21</sup> Importantly, similar striking changes are also observed in the meperidine relationship, which points to a critical role of F1579 in phasic block by meperidine.

## Discussion

Our primary goal in this study was to determine whether meperidine possesses the molecular pharmacologic properties required for classification as an LA.<sup>14</sup> We

MEPERIDINE AND LIDOCAINE BLOCK OF RECOMBINANT Na<sup>+</sup> CHANNELS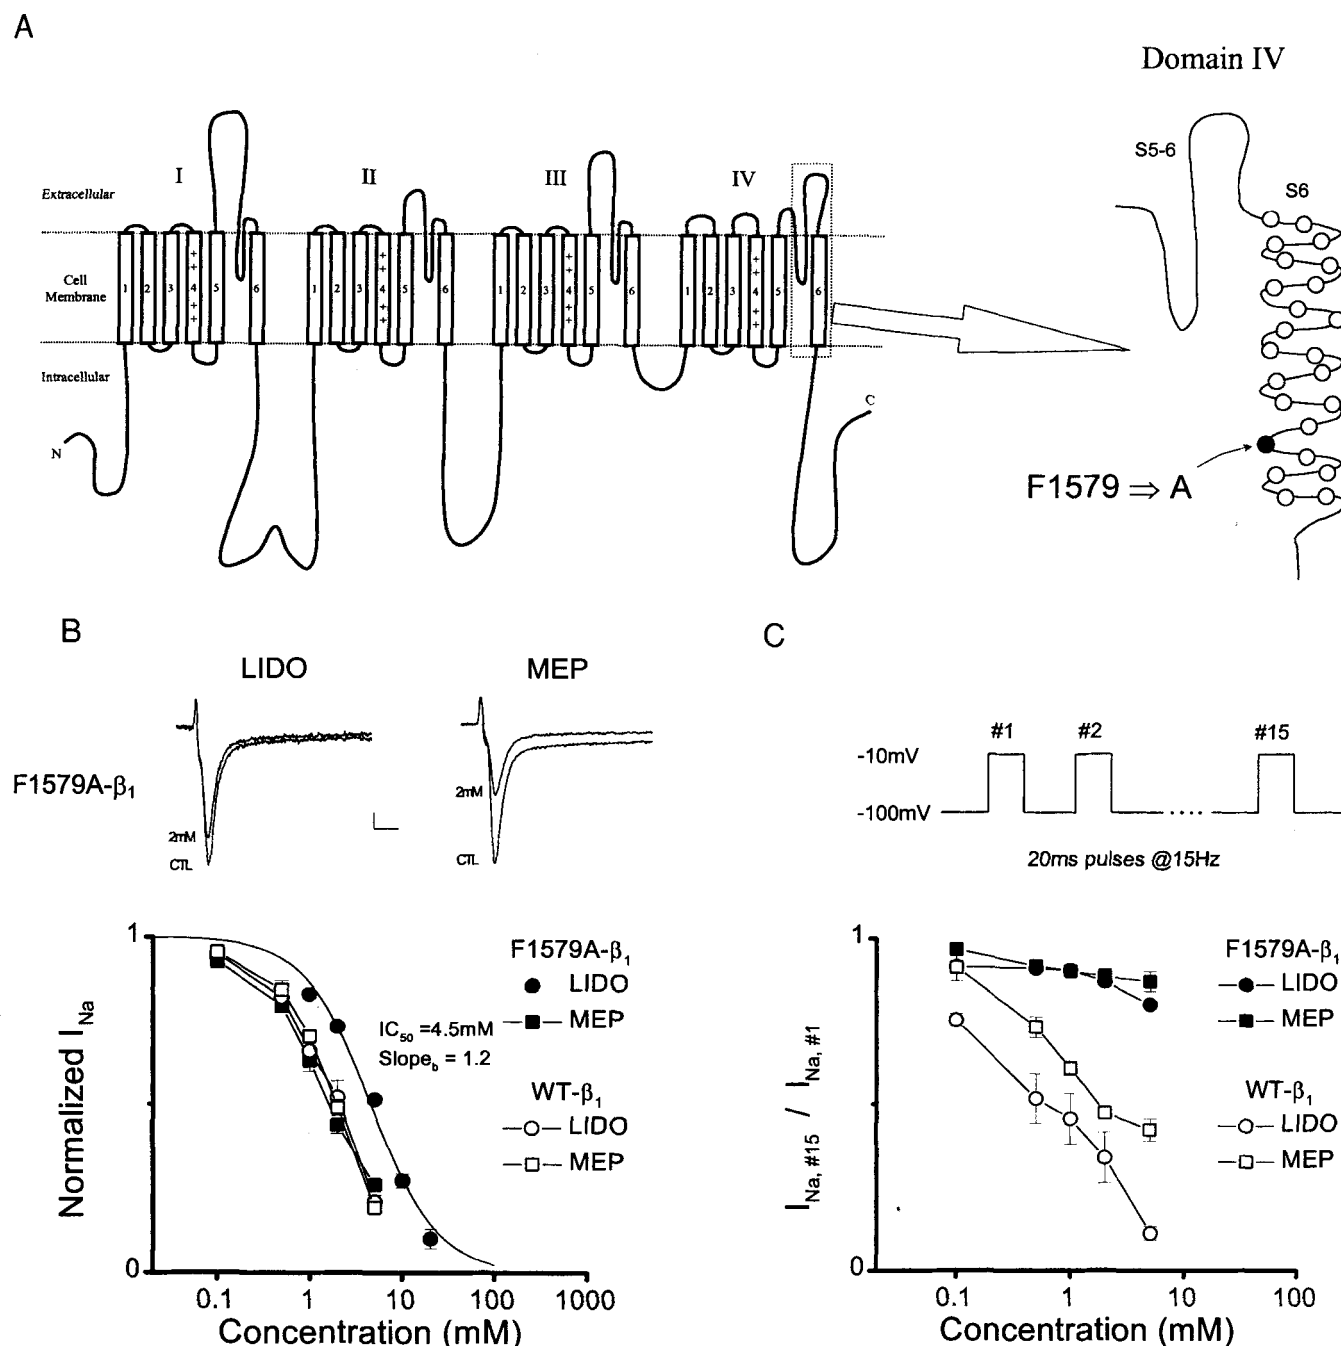

**Fig. 5.** Tonic and phasic block of F1579A- $\beta_1$  Na<sup>+</sup> currents. (A, left) Cartoon of the general putative structure of a pore-forming Na<sup>+</sup> channel  $\alpha$  subunit and the amino acid chains that reside within (membrane-spanning segments) and without the cell membrane (intracellular and extracellular loops). Area enclosed by dashed box is magnified (right) to show individual amino acids of the domain IV membrane-spanning segment S6 and an  $\alpha$ -helical structure. Residue F1579 is indicated. Mutation to an alanine (A), as shown, disrupts the associated intrapore LA receptor (see text). (B, top) individual  $I_{Na}$  values ( $-10$  mV depolarization, holding =  $-100$  mV) measured in oocytes expressing F1579A- $\beta_1$  in control (CTL) and 2 mM lidocaine or meperidine (as indicated). (B, bottom) Concentration-response relationships for  $I_{Na}$  amplitude normalized by control from oocytes expressing F1579A (filled symbols,  $n = 5-8$ ). WT relationships were replotted from figure 1 for comparison (open symbols). The smooth curve represents the logistic equation fit to lidocaine response (parameters indicated). (C) Concentration-response relationships for the ratio of  $I_{Na}$  amplitudes of pulse nos. 15 to 1 ( $I_{Na, \#15} / I_{Na, \#1}$ ) elicited by a pulse train (top) in grouped data for F1579A- $\beta_1$  ( $n = 5-8$ ). WT relationships were replotted from figure 2 for comparison (open symbols).

studied currents of heterologously expressed Na<sup>+</sup> channels, which provided a homogeneous channel population, thus likely eliminating other confounding channels and possible modulatory pathways.<sup>10</sup> This powerful approach was essential in examining the role of an intrapore LA receptor because it allowed manipulation of channel structure using mutagenesis. Our results, for the first time, indicate that meperidine blocks voltage-dependent Na<sup>+</sup> channels with hallmark features of LAs, including tonic and phasic blockade and a negative shift in the voltage dependence of steady-state inactivation. These effects were observed at millimolar concentrations roughly similar to lidocaine in this study and meperidine concentrations achieved during typical clinical dosing for subarachnoid administration.<sup>38</sup> Our data also show that disruption of the putative LA receptor through the F1579A mutation markedly reduced sensitivity to phasic block but not to tonic block. This apparent contradiction can be explained by an emerging picture of intrapore LA binding (see below), leading us to conclude that meperidine action involves an LA receptor. Overall, our results support the proposal that meperidine is an LA.

Local anesthetics induce two kinetically distinct blocking effects (rapid and discrete) of currents from single Na<sup>+</sup> channels lacking fast inactivation; this suggests LA binding within the Na<sup>+</sup> channel pore blocks ion flow and involves two distinct binding domains.<sup>39</sup> The possibility of dual separate binding domains finds additional support in recent observations. F1579A selectively eliminates discrete block in single RSkM1 channels lacking fast inactivation, suggesting F1579 contributes primarily to a binding domain mediating discrete block.<sup>40</sup> Discrete block may result when the aromatic tail of an LA molecule binds to a lipophilic binding pocket partly formed by F1579<sup>40</sup> or through  $\pi$  electron interactions between aromatic rings.<sup>21,41</sup> In addition, introduction of negative charge on the selectivity filter enhanced tonic block by tertiary amine but not neutral LAs.<sup>42</sup> F1579A and the homologous mutation in rat brain IIA<sup>21</sup> profoundly impairs phasic inhibition, thereby pointing to a critical role of discrete block. If discrete block is mediated by shallow lipophilic amino acid residues (*i.e.*, F1579), then rapid block may arise from interactions of the positively charged tertiary amine head with deep negatively charged structures on or adjacent to the selectivity filter. Assuming some form of these drug-channel configurations exist in resting channels, then interactions with a rapid binding domain may predominate in meperidine tonic inhibition. Therefore, meperidine tonic inhibition would be little changed by alteration of a discrete bind-

ing domain by mutation F1579A. Decreased meperidine interactions with a discrete binding domain accord with lower meperidine potency in phasic inhibition. In contrast, lidocaine may interact with the discrete domain in both tonic and phasic inhibition. Overall, these observations suggest a complex molecular picture for LA binding within the Na<sup>+</sup> channel pore. Further structural and pharmacologic studies are required for a deeper understanding of these pore interactions and LA inhibition.

The salient structural features of LAs include a tertiary amine linked to an aromatic group through an amide or ester bond. At physiologic pH, the tertiary amine is frequently protonated because its  $pK_A$  is approximately 8, resulting in a net positive charge. At a simple level, the molecular arrangement can be envisaged as a linear structure with a charged hydrophilic quaternary amine head and an aromatic lipophilic tail. Interestingly, these primary features are shared by meperidine, where the tertiary amine ( $pK_A = 8.5$ ) on the piperidine ring serves as the charged head, and a phenyl group serves as the lipophilic tail.<sup>43</sup> If these features figure prominently in LA binding with its receptor, then these shared qualities are consistent with meperidine being an LA.

In addition to meperidine, several other opioids induce LA effects. Morphine seems to inhibit sodium conductance of nerves and muscle in a manner that involves a direct LA effect<sup>10,44-46</sup> as well as an indirect opioid receptor-mediated pathway.<sup>10,45-47</sup> Methadone blocks peripheral mammalian nerves.<sup>7,48</sup> In addition, both fentanyl and sufentanil block nerve conduction.<sup>9,49</sup> It will prove interesting to determine whether these agents may qualify as LAs.

In this study, meperidine produced tonic inhibition comparable to lidocaine, but meperidine was fivefold less potent in phasic inhibition. Phasic inhibition likely plays a critical role in Na<sup>+</sup> blockade by some antiepileptic and antiarrhythmic drugs as well as in local anesthesia.<sup>50-52</sup> In these situations, impulses occurring with high frequency produce phasic inhibition that leads to action-potential refractoriness and impulse blockade. Therefore, our data suggest that meperidine is a weaker local anesthetic overall relative to lidocaine. Lower meperidine potency may provide insight into the results of clinical studies examining the ability of meperidine to induce local anesthesia of peripheral nerve, a requirement for classification as an LA. Oldroyd *et al.*<sup>11</sup> compared 40 ml of 0.1% and 0.2% pethidine (meperidine) to 0.5% prilocaine in intravenous regional anesthesia (40 ml) of the upper extremity. Meperidine (0.2%) produced sensory



MEPERIDINE AND LIDOCAINE BLOCK OF RECOMBINANT Na<sup>+</sup> CHANNELS

and motor blockade, but less profoundly than prilocaine. The authors concluded that pethidine has LA action on peripheral nerve but also observed dizziness, nausea, dry mouth, and respiratory depression exclusively in the meperidine group. Acalovschi and Cristea<sup>12</sup> performed a similar study of intravenous regional anesthesia (40 ml), except they compared meperidine (0.25%) with lidocaine (0.5%). Meperidine produced similar degrees of motor and sensory block but with slower onset than lidocaine. There was a significant increase in the incidence of dizziness, nausea, and pain at the injection site in the meperidine group. These studies indicate that meperidine induces clinical local anesthesia of peripheral nerve, although with increased incidence of undesirable side effects. Flanagan *et al.*<sup>13</sup> studied the effects of median nerve block (5 ml) with meperidine (0.5% and 1.5%) or lidocaine (0.25%) on compound motor action potentials and sensory nerve action potentials in humans. Lidocaine (0.25%) prolonged latencies of both responses consistent with a local anesthetic effect. In contrast, even 1.5% meperidine failed to alter latencies but did cause vertigo, nausea, and flushing in all subjects. Overall, these clinical findings are accounted for by weak LA potency and significant opioid activity of meperidine. Therefore, doses necessary for peripheral nerve block by meperidine may lead to serum concentrations sufficiently high to trigger undesirable central opioid effects (*i.e.*, nausea, dizziness, depression of respiratory drive). This clinical profile for regional anesthesia of peripheral nerves may relegate meperidine, as a sole agent, to patients allergic to LAs or as a supplement to traditional LAs.<sup>53</sup>

Our conclusion that meperidine is a weak LA has implications in sensory spinal anesthesia. Here, meperidine is roughly equipotent with hyperbaric lidocaine,<sup>1-5</sup> suggesting differences in LA mechanism for central and peripheral nerves.<sup>54</sup> This may be explained by inhibition of other ion channels in the central nervous system not present peripherally. Alternatively, this may result from differential LA sensitivity among voltage-dependent Na<sup>+</sup> channel isoforms in different tissues.<sup>26,31,55</sup> Understanding these divergent meperidine effects awaits further pharmacologic investigations of the central and peripheral nervous systems.

In summary, we report that meperidine blocks recombinant voltage-dependent Na<sup>+</sup> channels with molecular pharmacologic features characteristic of an LA. The findings lead us to classify meperidine as a weak LA.

## References

1. Famewo CE, Naguid M: Spinal anesthesia with meperidine as the sole agent. *Anaesth Soc J* 1985; 32:533-7
2. Sangarlangkarn S, Klaewtanong V, Jonglertrakool P, Khankaew V: meperidine as a spinal anesthetic agent: A comparison with lidocaine-glucose. *Anes Analg* 1987; 66:235-40
3. Patel D, Janardhan Y, Merai B, Robalino J, Shevde K: Comparison of intrathecal meperidine and lidocaine in endoscopic urological procedures. *Can J Anaesth* 1990; 37:567-670
4. Lewis RP, Spiers SP, McLaren IM: Pethidine as a spinal anaesthetic agent: A comparison with plain bupivacaine in patients undergoing transurethral resection of the prostate. *Eur J Anaesthesiol* 1992; 9:105-9
5. Norris MC, Honet JE, Leighton BL, Arkoosh VA: A comparison of meperidine and lidocaine for spinal anesthesia for postpartum tubal ligation. *Reg Anes* 1996; 21:84-8
6. Way EL: Studies on the local anesthetic properties of isoniprocaine. *J Am Pharm Assoc* 1946; 35:44-7
7. Kosterlitz HW, Wallis DI: The action of morphine-like drugs on impulse transmission in mammalian nerve fibres. *Br J Pharmacol* 1964; 22:499-510
8. Power I, Brown DT, Wildsmith JA: The effect of fentanyl, meperidine and diamorphine on nerve conduction *in vitro*. *Reg Anes* 1991; 16:204-8
9. Jaffe RA, Rowe MA: A comparison of the local anesthetic effects of meperidine, fentanyl, and sufentil on dorsal root axons. *Anes Analg* 1996; 83:776-81
10. Frank GB: Two mechanisms for the meperidine block of action potential production in frog's skeletal muscle: Non-specific and opiate drug receptor mediated blockade. *J Physiol (Lond)* 1975; 252:585-601
11. Oldroyd GJ, Tham EJ, Power I: An investigation of the local anaesthetic effects of pethidine in volunteers. *Anaesthesia* 1994; 49: 503-6
12. Acalovschi I, Cristea T: Intravenous regional anesthesia with meperidine. *Anes Analg* 1995; 81:539-43
13. Flanagan MT, Walker FO, Butterworth JF: Failure of meperidine to anesthetize human median nerve. *Reg Anes* 1997; 22:73-9
14. Catterall WA, Mackie K: Local anesthetics, *The Pharmacological Basis of Therapeutics*, 9th Edition. Edited by Hardman JG, Limbird LE. New York, McGraw-Hill, 1996, pp 331-47
15. Hille B: *Ionic Channels of Excitable Membranes*, 2nd Edition. Sunderland, MA, Sinauer Associates, 1992
16. Hille B: Local anesthetics: Hydrophilic and hydrophobic pathways for the drug-receptor reaction. *J Gen Physiol* 1977; 69:497-515
17. Hondeghem LM, Katzung BG: Time and voltage-dependent interactions of anti-arrhythmic drugs with cardiac sodium channels. *Biochim Biophys Acta* 1977; 472:373-98
18. Strichartz GR: The inhibition of sodium currents in myelinated nerve by quaternary derivatives of lidocaine. *J Gen Physiol* 1973; 62:37-57
19. Courtney KR: Mechanism of frequency-dependent inhibition of sodium currents in frog myelinated nerve by the lidocaine derivative GEA. *J Pharmacol Exp Ther* 1975; 195:225-36
20. Butterworth JF4, Strichartz GR: Molecular mechanisms of local anesthesia: A review. *ANESTHESIOLOGY* 1990; 72:711-34
21. Ragsdale DS, McPhee JC, Scheuer T, Catterall WA: Molecular determinants of state-dependent block of Na<sup>+</sup> channels by local anesthetics. *Science* 1994; 265:1724-8
22. Eaton MP, Wagner LW II, Tran S, Gingrich KJ: Meperidine

induces tonic and phasic blockade of voltage-dependent sodium channels (abstract). *ANESTHESIOLOGY* 1998; 89:A715

23. Sambrook J, Fritsch J, Maniatis T: *Molecular Cloning: A Laboratory Manual*, 2nd Edition. New York, Cold Spring Harbor Laboratory Press, 1989

24. Cannon SC, McClatchey AI, Gusella JF: Modification of the Na<sup>+</sup> current conducted by the rat skeletal muscle  $\alpha$  subunit by coexpression with a human brain  $\beta$  subunit. *Pflugers Archiv Eur J Physiol* 1993; 423:155-7

25. Isom LL, De Jongh KS, Catterall WA: Auxiliary subunits of voltage-gated ion channels. *Neuron* 1994; 12:1183-94

26. Nuss HB, Tomaselli GF, Marban E: Cardiac sodium channels (hH1) are intrinsically more sensitive to block by lidocaine than are skeletal muscle ( $\mu$ 1) channels. *J Gen Physiol* 1995; 106:1193-1209

27. Armstrong CM, Bezanilla F: Charge movement associated with the opening and closing of the activation gates of the Na channels. *J Gen Physiol* 1974; 63:533-52

28. Schwarz W, Palade PT, Hille B: Local anesthetics: Effect of pH on use-dependent block of sodium channels in frog muscle. *Biophys J* 1977; 20:343-68

29. Courtney KR, Kendig JJ, Cohen EN: Frequency-dependent conduction block: The role of nerve impulse pattern in local anesthetic potency. *ANESTHESIOLOGY* 1978; 48:111-7

30. Bean BP, Cohen CJ, Cohen CM: Lidocaine block of cardiac sodium channels. *J Gen Physiol* 198; 81:613-42

31. Wang DW, Nie L, George AL Jr, Bennett PB: Distinct local anesthetic affinities in Na<sup>+</sup> channel subtypes. *Biophys J* 1996; 70:1700-8

32. Nuss HB, Chiamvimonvat N, Perez-García MT, Tomaselli GF, Marban E: Functional association of the beta 1 subunit with human cardiac (hH1) and rat skeletal muscle ( $\mu$ 1) sodium channel alpha subunits expressed in *Xenopus* oocytes. *J Gen Physiol* 1995; 106:1171-91

33. Balsler JR, Nuss HB, Orias DW, Johns DC, Marban E, Tomaselli GF, Lawrence JH: Local anesthetics as effectors of allosteric gating: lidocaine effects on inactivation-deficient rat skeletal muscle Na channels. *J Clin Invest* 1996; 98:2874-86

34. Khodorov BI, Shishkova LD, Peganov E: The effect of procaine and calcium ions on slow sodium inactivation in the membrane of Ranvier's node of frog. *Bull Exp Biol Med* 1974; 3:10-4

35. Balsler JR, Nuss HB, Romashko DN, Marban E, Tomaselli GF: Functional consequences of lidocaine binding to slow-inactivated sodium channels. *J Gen Physiol* 1996; 107:643-58

36. Vedantham V, Cannon SC: The position of the fast-inactivation gate during lidocaine block of voltage-gated Na<sup>+</sup> channels. *J Gen Physiol* 1999; 113:1-10

37. Catterall WA: Cellular and molecular biology of voltage-gated sodium channels. *Physiol Rev* 1992; 72:S1:5-48

38. Nordberg G, Hansdottir V, Bondesson U: CSF and plasma pharmacokinetics of pethidine and norpethidine in man after epidural and intrathecal administration of pethidine. *Eur J Clin Pharmacol* 1988; 34:625-31

39. Gingrich KJ, Beardsley D, Yue DT: Ultra-deep blockade of Na<sup>+</sup> channels by a quaternary ammonium ion: Catalysis by a transition-intermediate state? *J Physiol (Lond)* 1993; 471:319-41

40. Kimbrough J, Gingrich KJ: Mutation in the putative local anesthetic receptor in IVS6 of rat skeletal muscle  $\mu$ 1 Na<sup>+</sup> channels alters single channel interactions (abstract). *Biophys J* 1998; 74:A32

41. Wright SN, Wang SY, Wang GK: Lysine point mutations in Na<sup>+</sup> channel D4-S6 reduce inactivated channel block by local anesthetics. *Mol Pharmacol* 1998; 54:733-9

42. Sunami A, Dudley SCJ, Fozzard HA: Sodium channel selectivity filter regulates antiarrhythmic drug binding. *Proc Natl Acad Sci USA* 1997; 94:14126-31

43. Cousins MJ, Mather LE: Intrathecal and epidural administration of opioids. *ANESTHESIOLOGY* 1984; 61:276-310

44. Frazier DT, Ohta M, Narahashi T: Nature of the morphine receptor present in the squid giant axon. *Proc Soc Biol Med* 1973; 142:1209-14

45. Jurna I, Grossmann W: The effect of morphine on mammalian nerve fibres. *Eur J Pharmacol* 1977; 44:339-48

46. Frank GB, Buttar HS: Effects of morphine and meperidine on action potential production in frog's skeletal muscle fibers. *J Physiol Pharmacol* 1975; 53:92-6

47. Yuge O, Matsumoto M, Kitahata LM: Direct opioid application to peripheral nerves does not alter compound action potentials. *Reg Anesth* 1985; 64:667-71

48. Staiman A, Seeman P: The impulse-blocking concentrations of anesthetics, alcohols, anticonvulsants, barbiturates, and narcotics on phrenic and sciatic nerves. *Can J Physiol Pharmacol* 1974; 52:535-50

49. Gissen AJ, Gugino LD, Datta S, Miller J, Covino BG: Effects of fentanyl and sufentanyl on peripheral mammalian nerves. *Anesth Analg* 1987; 66:1272-6

50. Hondeghem LM, Katzung BG: Antiarrhythmic agents: The modulated receptor mechanism of the action on sodium and calcium channel blocking drugs. *Ann Rev Pharmacol Toxicol* 1984; 24:387-423

51. Catterall WA: Common modes of drug action on Na<sup>+</sup> channels: Local anesthetics, antiarrhythmics, and anticonvulsants. *Trends Pharmacol Sci* 1987; 8:57-65

52. Rogawski MA, Porter RJ: Antiepileptic drugs: Pharmacological mechanism and clinical efficacy with consideration of promising developmental stage compounds. *Pharmacol Res* 1990; 42:223-86

53. Armstrong PJ, Morton CP, Minno AF: Pethidine has a local anesthetic action on peripheral nerves *in vivo*: Addition to prilocaine 0.25% for intravenous regional anaesthesia in volunteers. *Anaesthesia* 1993; 48:382-6

54. Butterworth JF, Walker FO: Is spinal anesthesia produced only by local anesthetics? *Reg Anes* 1996; 21:81-3

55. Ragsdale DS, Scheuer T, Catterall WA: Frequency and voltage-dependent inhibition of type IIA Na<sup>+</sup> channels, expressed in a mammalian cell line, by local anesthetic, antiarrhythmic, and anticonvulsant drugs. *Mol Pharmacol* 1991; 40:756-65
